# Supplementary material for: Synergistic effects of type I PRMT and PARP inhibitors against non-small cell lung cancer cells
Source: PubMed Central journal article supplement (PMC7948358; doi:10.1186/s13148-021-01037-1), 2021-03-10
Supplement: 13148_2021_1037_MOESM1_ESM.pdf [file 13148_2021_1037_MOESM1_ESM.pdf]

# Validation Data

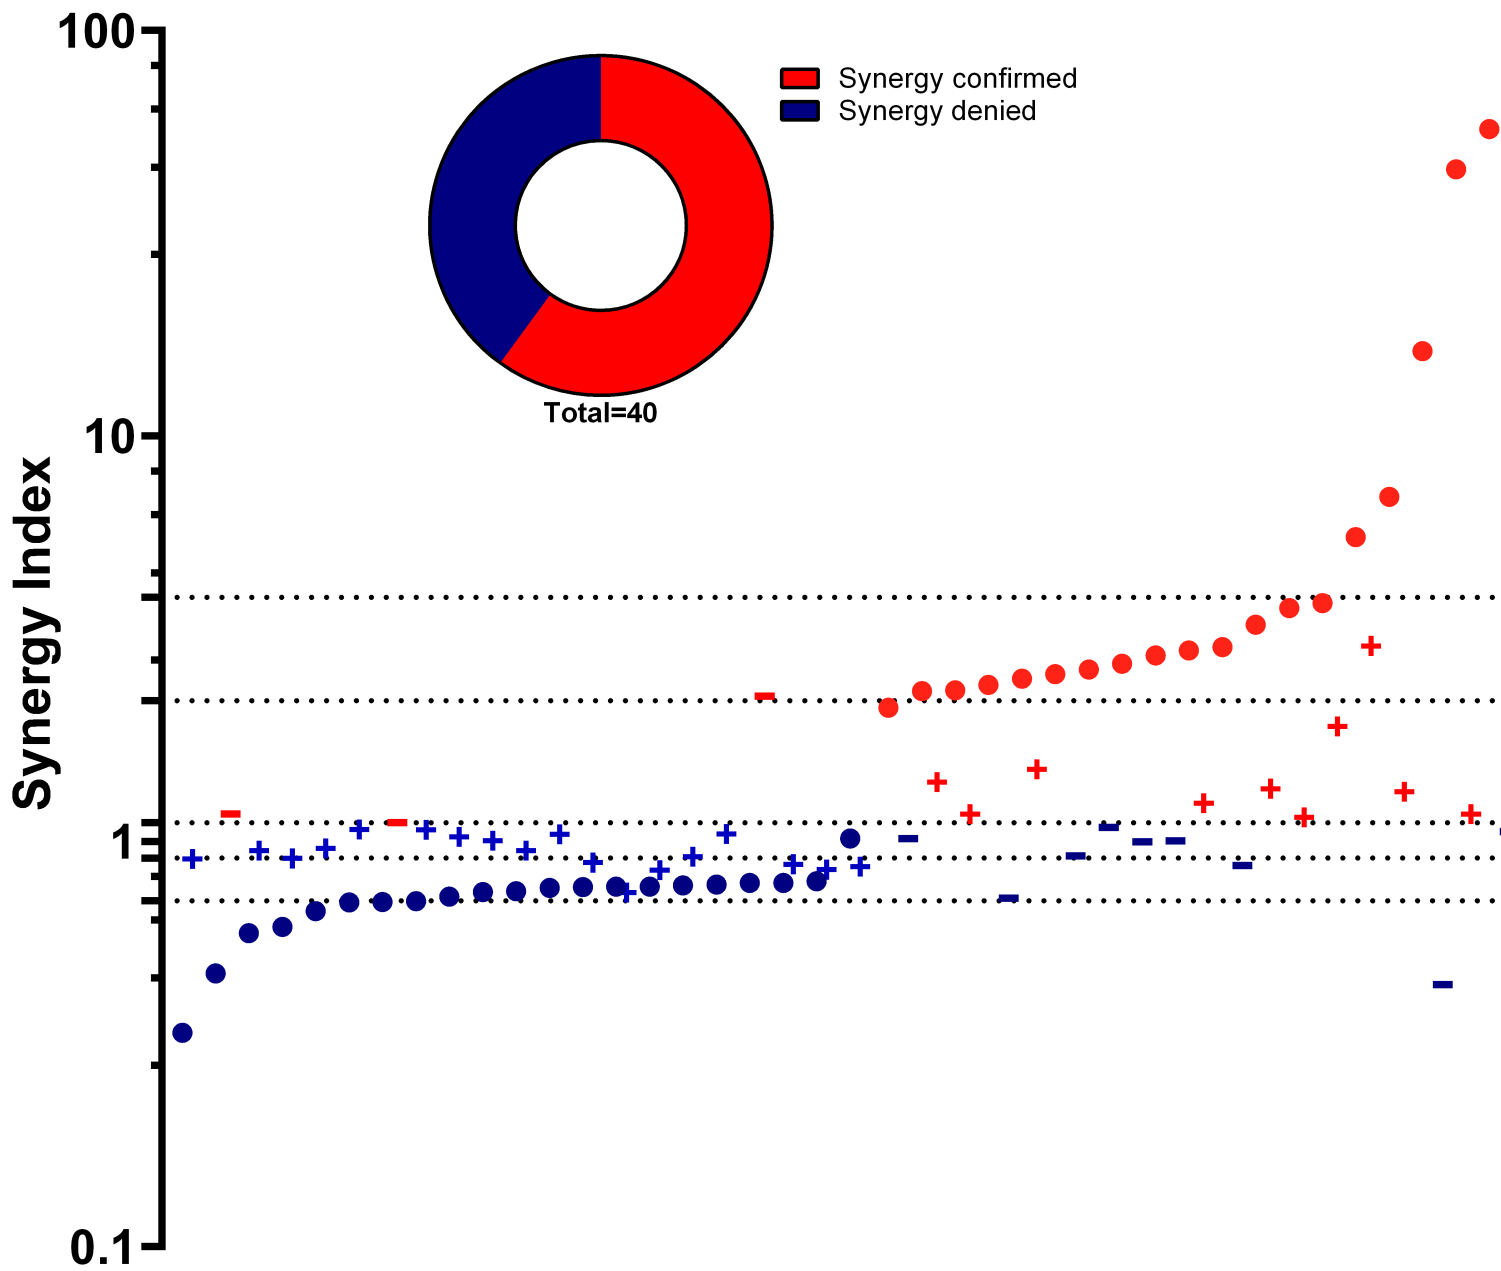

- Original data
- Original data
- + Confirmed Antagonism
- + Confirmed Synergy
- New Positives
- Lost Synergy

# Supplemental Figure 2

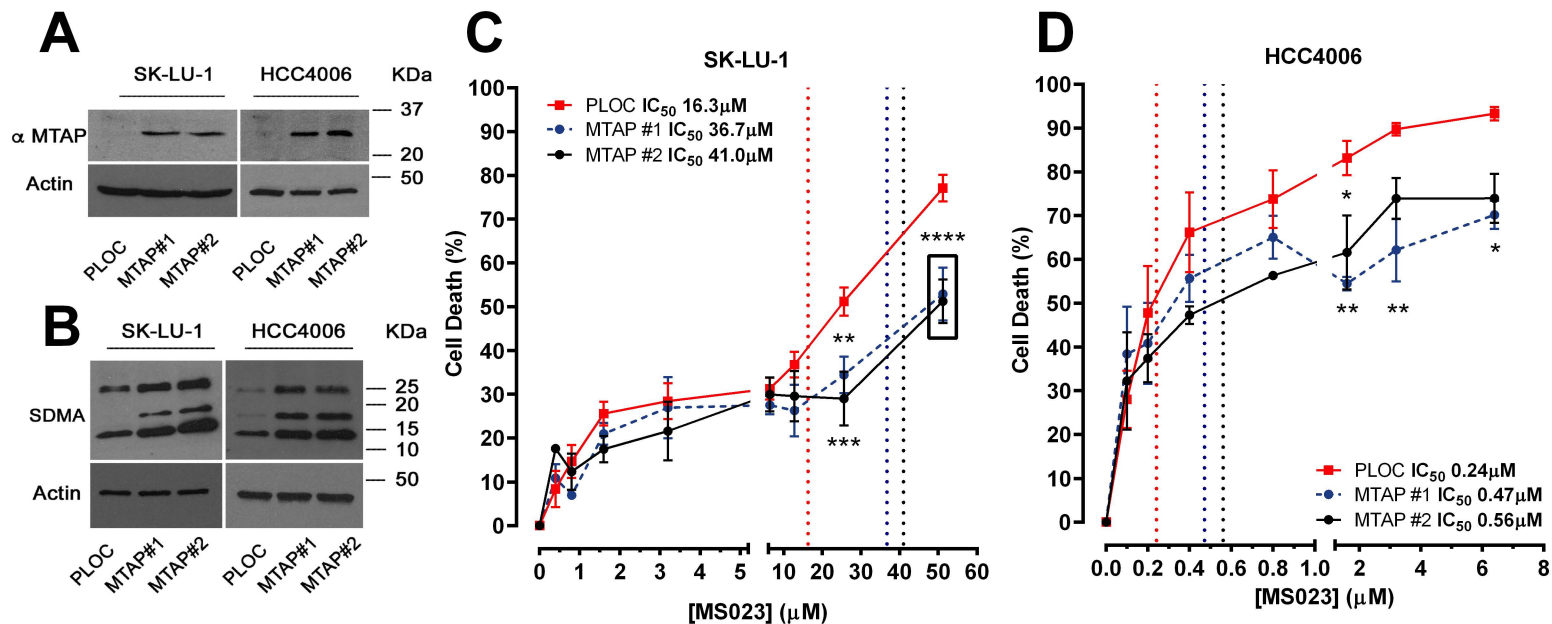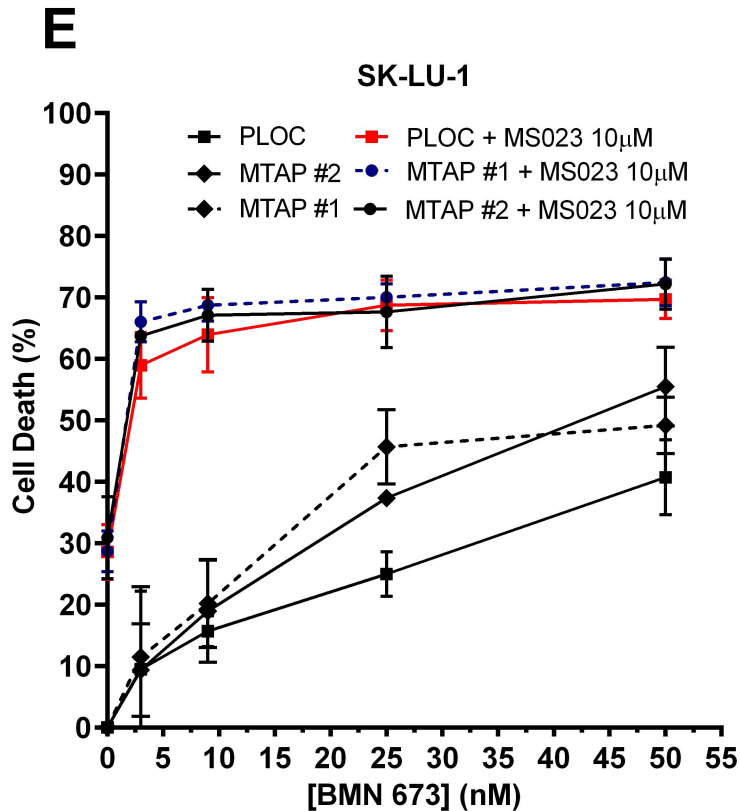

**G**

| BMN 673 (nM) | 3     | 9     | 25    | 50    |
|--------------|-------|-------|-------|-------|
| PLOC         | 20.31 | 19.68 | 18.63 | 13.79 |
| MTAP#1       | 21.19 | 17.77 | 11.19 | 4.13  |
| MTAP#2       | 18.52 | 16.10 | 11.13 | 2.70  |

**H**

| BMN 673 (nM) | 25    | 50    | 100   | 200   |
|--------------|-------|-------|-------|-------|
| PLOC         | -0.12 | -4.49 | 2.759 | 7.405 |
| MTAP#1       | 21.05 | 13.25 | 0.703 | -2.1  |
| MTAP#2       | 11.07 | 10.74 | 7.7   | 6.284 |

Supplemental Table 1

| Rank | Name                                | Target                            | Synergy Index |
|------|-------------------------------------|-----------------------------------|---------------|
| 1    | AMG-900                             | Aurora Kinase                     | 0.34          |
| 2    | TAK-901                             | Aurora Kinase                     | 0.47          |
| 3    | Gandotinib (LY2784544)              | JAK                               | 0.59          |
| 4    | IOX2                                | HIF                               | 0.61          |
| 5    | AZD1480                             | JAK                               | 0.67          |
| 6    | Sirtinol                            | Sirtuin                           | 0.71          |
| 7    | Abexinostat (PCI-24781)             | HDAC                              | 0.71          |
| 8    | 2-Methoxyestradiol (2-MeOE2)        | HIF                               | 0.71          |
| 9    | Aurora A Inhibitor I                | Aurora Kinase                     | 0.73          |
| 10   | RG108                               | DNA Methyltransferase,Transferase | 0.75          |
| 11   | GSK-LSD1 2HCl                       | Histone Demethylase               | 0.75          |
| 12   | Valproic acid                       | HDAC                              | 0.77          |
| 13   | Norfloxacin                         | Topoisomerase                     | 0.77          |
| 14   | Ruxolitinib (INCB018424)            | JAK                               | 0.77          |
| 15   | Pirarubicin                         | Topoisomerase                     | 0.77          |
| 16   | Selisistat (EX 527)                 | Sirtuin                           | 0.78          |
| 17   | Droxinostat                         | HDAC                              | 0.78          |
| 18   | AR-42                               | HDAC                              | 0.79          |
| 19   | Tubastatin A HCl                    | HDAC                              | 0.79          |
| 20   | GSK2879552 2HCl                     | Histone Demethylase               | 0.8           |
| 21   | Quisinostat (JNJ-26481585) 2HCl     | HDAC                              | 0.8           |
| 22   | Tofacitinib (CP-690550;Tasocitinib) | JAK                               | 0.81          |
| 23   | MS436                               | Epigenetic Reader Domain          | 0.82          |
| 24   | GSK591                              | Histone Methyltransferase         | 0.83          |
| 25   | PCI-34051                           | HDAC                              | 0.83          |
| 26   | WHI-P154                            | JAK                               | 0.83          |
| 27   | PJ34                                | PARP                              | 0.83          |
| 28   | MS023                               | Histone Methyltransferase         | 0.83          |
| 29   | EPZ015666(GSK3235025)               | Histone Methyltransferase         | 0.84          |
| 30   | BRD4770                             | Histone Methyltransferase         | 0.84          |
| 31   | Trichostatin A (TSA)                | HDAC                              | 0.84          |
| 32   | PHA-680632                          | Aurora Kinase                     | 0.84          |
| 33   | Resveratrol                         | Autophagy,Sirtuin                 | 0.84          |
| 34   | Anacardic Acid                      | Histone Acetyltransferase         | 0.84          |
| 35   | AZ 960                              | JAK                               | 0.85          |
| 36   | KW-2449                             | FLT3                              | 0.85          |
| 37   | GSK J1                              | Histone Demethylase               | 0.86          |
| 38   | UPF 1069                            | PARP                              | 0.86          |
| 39   | NVP-BSK805 2HCl                     | JAK                               | 0.86          |
| 40   | I-BET-762                           | Epigenetic Reader Domain          | 0.86          |
| 41   | Bromosporine                        | Epigenetic Reader Domain          | 0.87          |
| 42   | AZD1208                             | Pim                               | 0.87          |
| 43   | RVX-208                             | Epigenetic Reader Domain          | 0.87          |
| 44   | Vorinostat (SAHA; MK0683)           | HDAC                              | 0.87          |
| 45   | MK-5108 (VX-689)                    | Aurora Kinase                     | 0.88          |
| 46   | Mirin                               | ATM/ATR                           | 0.88          |
| 47   | ORY-1001 (RG-6016) 2HCl             | Histone Demethylase               | 0.88          |
| 48   | ML324                               | Histone Demethylase               | 0.88          |
| 49   | MG149                               | Histone Acetyltransferase         | 0.89          |
| 50   | EPZ011989                           | Histone Methyltransferase         | 0.9           |
| 51   | Ellagic acid                        | Topoisomerase                     | 0.9           |
| 52   | Remodelin                           | Histone Acetyltransferase         | 0.9           |
| 53   | UNC0631                             | Histone Methyltransferase         | 0.9           |
| 54   | CUDC-101                            | HDAC                              | 0.9           |
| 55   | GSK503                              | Histone Methyltransferase         | 0.91          |
| 56   | NVP-TNKS656                         | PARP                              | 0.93          |
| 57   | Entacapone                          | Histone Methyltransferase         | 0.93          |
| 58   | Ricolinostat (ACY-1215)             | HDAC                              | 0.93          |
| 59   | Nexturastat A                       | HDAC                              | 0.93          |

|     |                                     |                           |      |
|-----|-------------------------------------|---------------------------|------|
| 60  | BIX 01294                           | Histone Methyltransferase | 0.94 |
| 61  | Decitabine                          | DNA Methyltransferase     | 0.94 |
| 62  | SGC-CBP30                           | Epigenetic Reader Domain  | 0.96 |
| 63  | ZM 39923 HCl                        | JAK                       | 0.96 |
| 64  | Barasertib (AZD1152-HQPA)           | Aurora Kinase             | 0.96 |
| 65  | Sodium Phenylbutyrate               | HDAC                      | 0.96 |
| 66  | INO-1001 (3-Aminobenzamide)         | PARP                      | 0.97 |
| 67  | Daphnetin                           | PKA,EGFR,PKC              | 0.98 |
| 68  | Clevudine                           | DNA/RNA Synthesis         | 0.99 |
| 69  | CYC116                              | Aurora Kinase             | 0.99 |
| 70  | A-366                               | Histone Methyltransferase | 0.99 |
| 71  | AG-14361                            | PARP                      | 0.99 |
| 72  | PFI-1 (PF-6405761)                  | Epigenetic Reader Domain  | 1    |
| 73  | MI-3 (Menin-MLL Inhibitor)          | Histone Methyltransferase | 1    |
| 74  | CPI-360                             | Histone Methyltransferase | 1.01 |
| 75  | Alisertib (MLN8237)                 | Aurora Kinase             | 1.01 |
| 76  | Decernotinib (VX-509)               | JAK                       | 1.01 |
| 77  | Pracinostat (SB939)                 | HDAC                      | 1.01 |
| 78  | ENMD-2076 L-(+)-Tartaric acid       | Aurora Kinase             | 1.02 |
| 79  | SMI-4a                              | Pim                       | 1.02 |
| 80  | PFI-3                               | Epigenetic Reader Domain  | 1.02 |
| 81  | AT9283                              | Aurora Kinase             | 1.02 |
| 82  | SNS-314 Mesylate                    | Aurora Kinase             | 1.03 |
| 83  | UNC669                              | Epigenetic Reader Domain  | 1.03 |
| 84  | OF-1                                | Epigenetic Reader Domain  | 1.03 |
| 85  | TMP269                              | HDAC                      | 1.03 |
| 86  | Nedaplatin                          | DNA/RNA Synthesis         | 1.04 |
| 87  | OG-L002                             | Histone Demethylase       | 1.04 |
| 88  | I-BRD9                              | Epigenetic Reader Domain  | 1.04 |
| 89  | RG2833 (RGFP109)                    | HDAC                      | 1.04 |
| 90  | Procainamide HCl                    | DNA Methyltransferase     | 1.05 |
| 91  | Lomeguatrib                         | DNA Methyltransferase     | 1.05 |
| 92  | GSK1324726A (I-BET726)              | Epigenetic Reader Domain  | 1.05 |
| 93  | Tranylcypromine (2-PCPA) HCl        | MAO                       | 1.06 |
| 94  | Momelotinib (CYT387)                | JAK                       | 1.06 |
| 95  | Tubastatin A                        | HDAC                      | 1.08 |
| 96  | S-Ruxolitinib (INCB018424)          | JAK                       | 1.08 |
| 97  | Resminostat                         | HDAC                      | 1.09 |
| 98  | WP1066                              | JAK                       | 1.09 |
| 99  | (+)-JQ1                             | Epigenetic Reader Domain  | 1.09 |
| 100 | Blasticidin S HCl                   | DNA/RNA Synthesis         | 1.09 |
| 101 | BI-7273                             | Epigenetic Reader Domain  | 1.09 |
| 102 | 3-deazaneplanocin A (DZNeP) HCl     | Histone Methyltransferase | 1.1  |
| 103 | M344                                | HDAC                      | 1.1  |
| 104 | Tacedinaline (CI994)                | HDAC                      | 1.1  |
| 105 | GSK J4 HCl                          | Histone Demethylase       | 1.1  |
| 106 | AZ6102                              | PARP                      | 1.11 |
| 107 | Niraparib (MK-4827) tosylate        | PARP                      | 1.13 |
| 108 | Quercetin                           | Src,Sirtuin,PKC,PI3K      | 1.14 |
| 109 | Mocetinostat (MGCD0103)             | HDAC                      | 1.14 |
| 110 | Zebularine                          | DNA Methyltransferase     | 1.16 |
| 111 | Baricitinib (LY3009104; INCB028050) | JAK                       | 1.16 |
| 112 | GSK2801                             | Epigenetic Reader Domain  | 1.17 |
| 113 | Iniparib (BSI-201)                  | PARP                      | 1.18 |
| 114 | Daptomycin                          | DNA/RNA Synthesis         | 1.19 |
| 115 | JNJ-7706621                         | Aurora Kinase             | 1.2  |
| 116 | Pacritinib (SB1518)                 | FLT3                      | 1.2  |
| 117 | SGC 0946                            | Histone Methyltransferase | 1.21 |
| 118 | Fedratinib (SAR302503; TG101348)    | JAK                       | 1.22 |
| 119 | CPI-203                             | Epigenetic Reader Domain  | 1.23 |
| 120 | SGI-1776 free base                  | Pim                       | 1.24 |

|     |                                 |                           |       |
|-----|---------------------------------|---------------------------|-------|
| 121 | MI-2 (Menin-MLL Inhibitor)      | Histone Methyltransferase | 1.24  |
| 122 | Ofloxacin                       | Topoisomerase             | 1.24  |
| 123 | GSK1070916                      | Aurora Kinase             | 1.24  |
| 124 | PJ34 HCl                        | PARP                      | 1.26  |
| 125 | Oclacitinib                     | JAK                       | 1.27  |
| 126 | UNC1215                         | Epigenetic Reader Domain  | 1.27  |
| 127 | Azacitidine                     | DNA Methyltransferase     | 1.27  |
| 128 | CEP-33779                       | JAK                       | 1.27  |
| 129 | CPI-169                         | Histone Methyltransferase | 1.28  |
| 130 | C646                            | Histone Acetyltransferase | 1.29  |
| 131 | Rucaparib                       | PARP                      | 1.31  |
| 132 | MM-102                          | Histone Methyltransferase | 1.32  |
| 133 | ITSA-1 (ITSA1)                  | HDAC                      | 1.35  |
| 134 | CUDC-907                        | HDAC                      | 1.36  |
| 135 | Mitomycin C                     | DNA/RNA Synthesis         | 1.36  |
| 136 | OTX015                          | Epigenetic Reader Domain  | 1.37  |
| 137 | JIB-04                          | Histone Demethylase       | 1.41  |
| 138 | PF-CBP1 HCl                     | Epigenetic Reader Domain  | 1.43  |
| 139 | 4SC-202                         | HDAC                      | 1.44  |
| 140 | EI1                             | Histone Methyltransferase | 1.46  |
| 141 | Scriptaid                       | HDAC                      | 1.46  |
| 142 | AG-490 (Tyrphostin B42)         | JAK                       | 1.47  |
| 143 | SGC707                          | Histone Methyltransferase | 1.48  |
| 144 | Givinostat (ITF2357)            | HDAC                      | 1.48  |
| 145 | Cytarabine                      | DNA/RNA Synthesis         | 1.48  |
| 146 | RGFP966                         | HDAC                      | 1.51  |
| 147 | Danuserib (PHA-739358)          | Aurora Kinase             | 1.51  |
| 148 | ZM 447439                       | Aurora Kinase             | 1.56  |
| 149 | MLN8054                         | Aurora Kinase             | 1.57  |
| 150 | Pinometostat (EPZ5676)          | Histone Methyltransferase | 1.61  |
| 151 | APTSTAT3-9R                     | STAT                      | 1.63  |
| 152 | HLCL-61 HCL                     | Histone Methyltransferase | 1.66  |
| 153 | Carboplatin                     | DNA/RNA Synthesis         | 1.67  |
| 154 | PFI-2 HCl                       | Histone Methyltransferase | 1.71  |
| 155 | XL019                           | JAK                       | 1.79  |
| 156 | Belinostat (PXD101)             | HDAC                      | 1.84  |
| 157 | Roxadustat (FG-4592)            | HIF                       | 1.88  |
| 158 | Olaparib (AZD2281; Ku-0059436)  | PARP                      | 1.93  |
| 159 | ME0328                          | PARP                      | 2.01  |
| 160 | Hesperadin                      | Aurora Kinase             | 2.07  |
| 161 | TG101209                        | FLT3                      | 2.08  |
| 162 | Tozasertib (VX-680; MK-0457)    | Aurora Kinase             | 2.13  |
| 163 | ENMD-2076                       | FLT3                      | 2.14  |
| 164 | Gemcitabine HCl                 | DNA/RNA Synthesis         | 2.35  |
| 165 | EPZ004777                       | Histone Methyltransferase | 2.36  |
| 166 | CX-6258 HCl                     | Pim                       | 2.43  |
| 167 | UNC0379                         | Histone Methyltransferase | 2.52  |
| 168 | Tofacitinib (CP-690550) Citrate | JAK                       | 2.59  |
| 169 | Mizoribine                      | DNA/RNA Synthesis         | 2.65  |
| 170 | IOX1                            | Histone Demethylase       | 2.74  |
| 171 | Procabazine HCl                 | DNA/RNA Synthesis         | 2.87  |
| 172 | SGI-1027                        | DNA Methyltransferase     | 2.96  |
| 173 | AZD2461                         | PARP                      | 3.02  |
| 174 | Panobinostat (LBH589)           | HDAC                      | 3.42  |
| 175 | Entinostat (MS-275)             | HDAC                      | 3.76  |
| 176 | Dacinostat (LAQ824)             | HDAC                      | 3.87  |
| 177 | MC1568                          | HDAC                      | 5.63  |
| 178 | SP2509                          | Histone Demethylase       | 7.08  |
| 179 | SRT1720 HCl                     | Sirtuin                   | 16.18 |
| 180 | Veliparib (ABT-888)             | PARP                      | 45.5  |
| 181 | Filgotinib (GLPG0634)           | JAK                       | 57.18 |

Supplemental table 2

| Name                            | Target                             | Synergy Index |            |
|---------------------------------|------------------------------------|---------------|------------|
|                                 |                                    | Screen        | Validation |
| AMG-900                         | Aurora Kinase                      | 0.34          | 0.90       |
| TAK-901                         | Aurora Kinase                      | 0.47          | 1.17       |
| Gandotinib (LY2784544)          | JAK                                | 0.59          | 0.95       |
| IOX2                            | HIF                                | 0.61          | 0.91       |
| AZD1480                         | JAK                                | 0.67          | 0.96       |
| Sirtinol                        | Sirtuin                            | 0.71          | 1.07       |
| Abexinostat (PCI-24781)         | HDAC                               | 0.71          | 1.11       |
| 2-Methoxyestradiol (2-MeOE2)    | HIF                                | 0.71          | 1.07       |
| Aurora Inhibitor I              | Aurora Kinase                      | 0.73          | 1.02       |
| RG108                           | DNA Methyltransferase, Transferase | 0.75          | 1.00       |
| GSK-LSD1 2HCl                   | Histone Demethylase                | 0.75          | 0.95       |
| Valproic acid sodium salt       | HDAC                               | 0.77          | 1.04       |
| Norfloxacin                     | Topoisomerase                      | 0.77          | 0.89       |
| Pirarubicin                     | Topoisomerase                      | 0.77          | 0.75       |
| Ruxolitinib (INCB018424)        | JAK                                | 0.77          | 0.85       |
| Selisistat (EX 527)             | Sirtuin                            | 0.78          | 0.92       |
| Droxinostat                     | HDAC                               | 0.78          | 1.04       |
| AR-42                           | HDAC                               | 0.79          | 2.28       |
| Tubastatin A HCl                | HDAC                               | 0.79          | 0.88       |
| GSK2879552 2HCl                 | Histone Demethylase                | 0.8           | 0.85       |
| ENMD-2076                       | FLT3                               | 1.02          | 0.87       |
| Tozasertib (VX-680; MK-0457)    | Aurora Kinase                      | 2.13          | 1.02       |
| Gemcitabine HCl                 | DNA/RNA Synthesis                  | 2.35          | 1.40       |
| EPZ004777                       | Histone Methyltransferase          | 2.36          | 1.17       |
| CX-6258 HCl                     | Pim                                | 2.43          | 0.72       |
| UNC0379                         | Histone Methyltransferase          | 2.52          | 1.51       |
| Tofacitinib (CP-690550) Citrate | JAK                                | 2.59          | 0.92       |
| Mizoribine                      | DNA/RNA Synthesis                  | 2.65          | 1.08       |
| IOX1                            | Histone Demethylase                | 2.74          | 1.00       |
| Procarbazine HCl                | DNA/RNA Synthesis                  | 2.87          | 1.00       |
| SGI-1027                        | DNA Methyltransferase              | 2.96          | 1.24       |
| AZD2461                         | PARP                               | 3.02          | 0.87       |
| Panobinostat (LBH589)           | HDAC                               | 3.42          | 1.35       |
| Entinostat (MS-275)             | HDAC                               | 3.76          | 1.15       |
| Dacinostat (LAQ824)             | HDAC                               | 3.87          | 1.92       |
| MC1568                          | HDAC                               | 5.63          | 3.04       |
| SP2509                          | Histone Demethylase                | 7.08          | 1.33       |
| SRT1720 HCl                     | Sirtuin                            | 16.18         | 0.44       |
| Veliparib (ABT-888)             | PARP                               | 45.5          | 1.17       |
| Filgotinib (GLPG0634)           | JAK                                | 57.18         | 1.06       |
